# Supplementary material for: Polyphosphate Ester-Type Transporters Improve Antimicrobial Properties of Oxytetracycline
Source: MDPI journal article supplement (doi:10.3390/antibiotics12030616), 2023-03-20
Supplement: s1 [file s1]

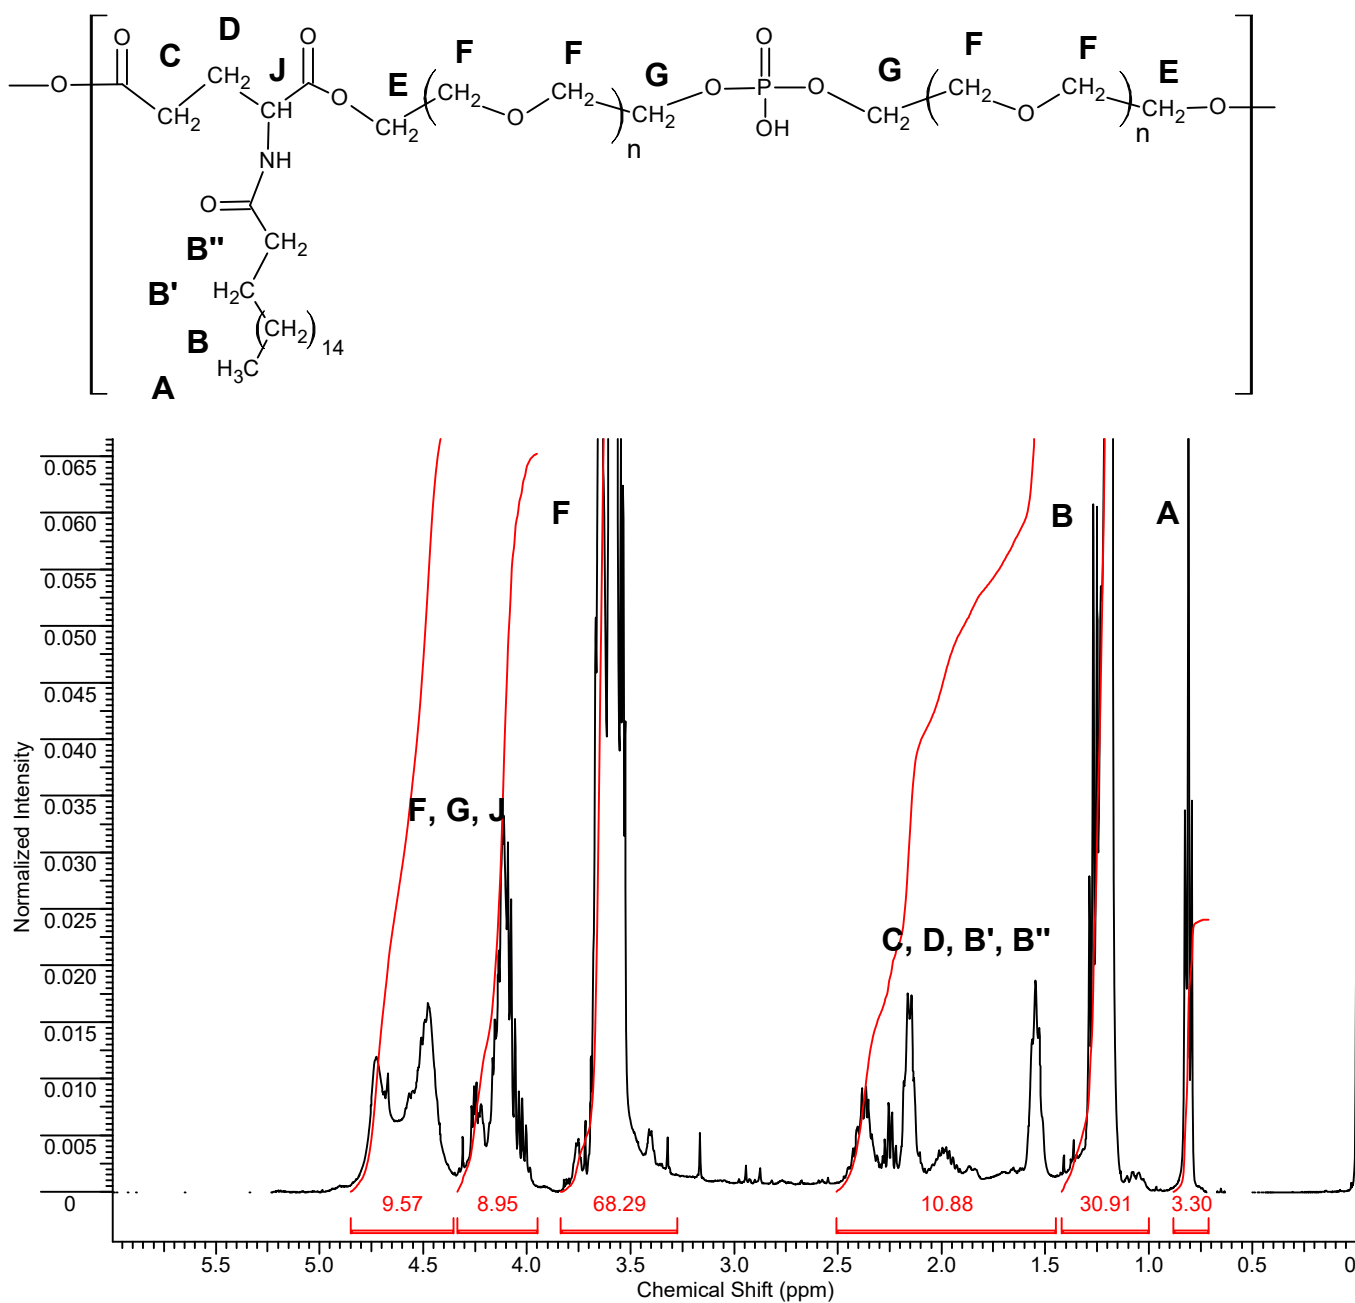

Figure S1. The  $^1\text{H}$  NMR spectrum of the newly synthesized phosphorus-containing polyesters (PPE).
